# Supplementary material for: Identifying Therapeutic Targets for Sepsis Research: A Characterization Study of the Inflammatory Players in the Cecal Ligation and Puncture Model
Source: Hindawi journal article supplement (doi:10.1155/2018/5130463), 2018-08-05
Supplement: f1 [file 5130463.f1.pdf]

**Supplementary table 1** The *clinical disease score* (CDS) as applied in our study to score signs of disease in individual mice.

| <i>Sign</i>                                                         | <i>Score</i> |
|---------------------------------------------------------------------|--------------|
| Piloerection (not present – extensive)                              | 0-2          |
| Conjunctivitis (not present – bilateral)                            | 0-2          |
| Grooming behaviour (normal – none)                                  | 0-2          |
| Mobility (normal – reduced – immobile)                              | 0-3          |
| Signs of peritoneal irritation (none – tiptoeing and broad<br>pace) | 0-2          |
| Position of the ears (erect – flat)                                 | 0-1          |
| Stool consistency (normal – sticky or diarrhea)                     | 0-1          |
| Anemic appearance (absent or present)                               | 0-1          |
| Moribund                                                            | 0-1          |

---

Total *Clinical Disease Score* (no signs of disease – 0-15

maximum)

**Supplementary Table 2** Specifications of the BD Accuri™ C6 flow cytometer

---

BD Accuri™ C6 flow cytometer

---

488 nm and 640 nm laser, 3 blue 1 red configuration

Optical filter FL1 533/30 nm (FITC, BB515)

Optical filter FL2 585/40 (PE, PE-CF594, PI)

Optical filter FL3 > 670 nm (PerCP-Cy5.5, PE-Cy7, PI)

Optical filter FL4 675/25 nm (APC, AF647)

---

**Supplementary table 3** Immune cell populations stained with the characterization experiments. The different antibodies used for the flow cytometry experiments.

| <b>Antibody</b>                               | <b>Manufacturer<br/>(reference)</b> | <b>Clone</b> |
|-----------------------------------------------|-------------------------------------|--------------|
| <b>Panel 1 – dendritic cell stain</b>         |                                     |              |
| Rat anti-mouse CD11b BB515                    | BD Horizon (564454)                 | M1/70        |
| Hamster anti-mouse CD11c PE-CF594             | BD Horizon (562454)                 | HL3          |
| anti-mouse I-A/I-E (MHCII)<br>PerCPCy5.5      | Biolegend (107625)                  | M5/114.15.2  |
| anti-mouse CD103 APC                          | Biolegend (121413)                  | 2E7          |
| <b>Panel 2 – macrophage / mast cell stain</b> |                                     |              |
| Rat anti-mouse IgE FITC                       | eBioscience (11-5992)               | 23G3         |
| Rat anti-mouse CD117 PE                       | eBioscience (12-1172)               | ACK2         |

|                          |                       |     |
|--------------------------|-----------------------|-----|
| Rat anti-mouse F4/80 APC | eBioscience (17-4801) | BM8 |
|--------------------------|-----------------------|-----|

---

**Panel 3 – T and B cell stain**

|                         |                        |      |
|-------------------------|------------------------|------|
| Rat anti-mouse CD3 FITC | BD Pharmingen (561798) | 17A2 |
|-------------------------|------------------------|------|

|                        |                        |        |
|------------------------|------------------------|--------|
| Rat anti-mouse CD8a PE | BD Pharmingen (553032) | 53-6.7 |
|------------------------|------------------------|--------|

|                               |                        |       |
|-------------------------------|------------------------|-------|
| Rat anti-mouse CD4 PerCPCy5.5 | BD Pharmingen (550954) | RM4-5 |
|-------------------------------|------------------------|-------|

|                         |                        |     |
|-------------------------|------------------------|-----|
| Rat anti-mouse CD19 APC | BD Pharmingen (561738) | 1D3 |
|-------------------------|------------------------|-----|

---

**Panel 4 – regulatory T cell stain**

|                          |                        |      |
|--------------------------|------------------------|------|
| Rat anti-mouse CD25 FITC | BD Pharmingen (561798) | 17A2 |
|--------------------------|------------------------|------|

|                               |                        |       |
|-------------------------------|------------------------|-------|
| Rat anti-mouse CD4 PerCPCy5.5 | BD Pharmingen (550954) | RM4-5 |
|-------------------------------|------------------------|-------|

|                            |                        |      |
|----------------------------|------------------------|------|
| Rat anti-mouse Foxp3 AF647 | BD Pharmingen (560401) | MF23 |
|----------------------------|------------------------|------|

---

**Panel 5 – neutrophil / natural killer cell / monocyte stain**

|                            |                     |       |
|----------------------------|---------------------|-------|
| Rat anti-mouse CD11b BB515 | BD Horizon (564454) | M1/70 |
|----------------------------|---------------------|-------|

|                            |                        |        |
|----------------------------|------------------------|--------|
| Rat anti-mouse CD335 PE    | BD Pharmingen (560757) | 29A1.4 |
| Rat anti-mouse Ly6G PE-Cy7 | BD Pharmingen (560601) | 1A8    |
| Rat anti-mouse Ly6C APC    | BD Pharmingen (560595) | AL-21  |

---

**Supplementary table 4** Cell surface markers used in the flow cytometric analysis of mouse leukocytes. The different cell surface markers that were applied during the flow cytometry experiments in order to characterize different subsets of leukocytes. APC: antigen presenting cell; CD: cluster of differentiation; Ig: immunoglobulin; NK: natural killer; TCR:T cell receptor. A simplified overview based upon current knowledge and adapted from Abbas *et al.*, 2013.

| Marker (CD) | Signifies...                                                   | Found on...                                                                                       |
|-------------|----------------------------------------------------------------|---------------------------------------------------------------------------------------------------|
| CD103       | Integrin alpha E                                               | intraepithelial lymphocytes, lamina propria T cells, subset of gut mucosa and MLN dendritic cells |
| CD11b       | Integrin alpha M (macrophage-1 antigen, complement receptor 3) | innate immune cells (monocytes, macrophages, dendritic cells, natural killer cells)               |
| CD11c       | Integrin alpha X                                               | dendritic cells, monocytes, macrophages                                                           |

|       |                                                                                                     |                                             |
|-------|-----------------------------------------------------------------------------------------------------|---------------------------------------------|
| CD117 | Mast/stem cell growth factor<br>receptor / proto-oncogene c-Kit                                     | mast cells, interstitial cells of Cajal     |
| CD19  | B-lymphocyte antigen CD19                                                                           | B cells                                     |
| CD25  | $\alpha$ -chain interleukin-2 receptor                                                              | activated T and B cells, regulatory T cells |
| CD3   | complex consisting out of the $\gamma$ , $\delta$ and two $\epsilon$ -chains of the T cell-receptor | T cells                                     |
| CD335 | Natural cytotoxicity triggering<br>receptor 1 (activation receptor),<br>synonym NKp46               | NK cells                                    |
| CD4   | co-receptor of the T cell receptor<br>(TCR)                                                         | T helper cells, monocytes                   |
| CD8a  | co-receptor of the TCR, recognition<br>of antigens presented by APCs                                | Cytotoxic T cells                           |



|                    |                                                                                           |                                                  |
|--------------------|-------------------------------------------------------------------------------------------|--------------------------------------------------|
| Foxp3              | regulator in the development and differentiation of immune suppressing regulatory T cells | Regulatory T cells                               |
| F4/80              | cell surface glycoprotein                                                                 | murine macrophages                               |
| Ly6G               | unknown; neutrophil migration (?)                                                         | neutrophils                                      |
| I-A/I-E<br>(MHCII) | major histocompatibility complex II, found on APC                                         | dendritic cells, mononuclear phagocytes, B cells |
| IgE                | Immunoglobulin E                                                                          | basophils, mast cells                            |
| Ly6C               | co-stimulatory signal for T cell activation, homing of cytotoxic T cells                  | monocytes                                        |

**Supplementary Table 5 Changes in absolute percentage of different leukocyte populations in gastrointestinal tissues following CLP-induced sepsis**

|                              | Spleen                 |                        | MLN                    |                        | Ileum LPMC             |                        | Colon LPMC             |                        |
|------------------------------|------------------------|------------------------|------------------------|------------------------|------------------------|------------------------|------------------------|------------------------|
|                              | <i>sham</i> →<br>CLPd2 | <i>sham</i> →<br>CLPd7 | <i>sham</i> →<br>CLPd2 | <i>sham</i> →<br>CLPd7 | <i>sham</i> →<br>CLPd2 | <i>sham</i> →<br>CLPd7 | <i>sham</i> →<br>CLPd2 | <i>sham</i> →<br>CLPd7 |
| <b>T cells</b>               | +7.44%                 | -70.79% *              | +4.51%                 | -32.33% *              | -1.02%                 | -10.02%                | -24.50%                | -20.97%                |
| <b>T helper cells</b>        | -5.49%                 | -79.32% *              | -2.35%                 | -40.61% *              | -24.50%                | -21.09%                | -9.73%                 | -16.81%                |
| <b>Cytotoxic T cells</b>     | +11.18%                | -78.88% *              | +18.12%                | -17.67%                | -8.56%                 | -6.16%                 | -52.21%                | -47.06%                |
| <b>Tregs</b>                 | +46.39% <sup>a</sup>   | -64.46% *              | +43.54%                | -8.16%                 | +35.00%                | +10.00%                | +20.00%                | +26.67%                |
| <b>B cells</b>               | +10.56%                | -71.47% *              | -0.38%                 | +26.47% *              | -8.02%                 | -34.77% <sup>b</sup>   | -44.12%                | -47.19%                |
| <b>Dendritic cells</b>       | -33.11%                | -67.57% *              | -19.20%                | -4.80%                 | +104.76% *             | +111.11% *             | -9.84%                 | +134.43% *             |
| <b>CD103<sup>+</sup> DCs</b> | -18.18%                | -18.18%                | -4.55%                 | +4.55%                 | +71.43%                | -7.14%                 | +10.00%                | -30.00%                |
| <b>CD11b<sup>+</sup> DCs</b> | -9.09%                 | -86.36% *              | -4.55%                 | -34.09%                | +23.53%                | +138.24% *             | -38.24%                | +179.41% *             |

|                                 |           |            |                      |            |          |           |            |            |
|---------------------------------|-----------|------------|----------------------|------------|----------|-----------|------------|------------|
| <b>Macrophages</b>              | +66.98% * | -18.42%    | +64.17% <sup>c</sup> | +97.08% *  | -5.00%   | -67.00% * | -14.86%    | -72.97% *  |
| <b>Mast cells</b>               | +93.65%   | +283.33% * | +57.73%              | +197.94% * | +110.53% | +172.63%  | +135.24%   | +64.76%    |
| <b>Monocytes</b>                | +3.07%    | +2.17%     | -3.64%               | +3.08%     | +16.16%  | +60.70%   | -23.77%    | +91.47% *  |
| <b>Natural killer<br/>cells</b> | -42.89% * | -19.67%    | +24.81%              | +447.29% * | +7.36%   | +99.13% * | +59.14%    | +165.59% * |
| <b>Neutrophils</b>              | +23.49%   | +97.44% *  | +31.29%              | +122.79% * | +25.00%  | +31.63%   | +239.86% * | +115.38% * |

Percentage increase or decrease in the absolute number of leukocyte subset in the overall leukocyte gate (based upon FSC and SSC properties) in comparison to the sham-group. One-way ANOVA with post-hoc Dunnett or non-parametric equivalent as appropriate, with the sham-group as control. \* $p < 0.05$ ; <sup>a</sup> $p = 0.086$ ; <sup>b</sup> $p = 0.067$ ; <sup>c</sup> $p = 0.075$  for the post-hoc Dunnett. N = 10-12/group for spleen and MLN, n = 6-7/group for ileum and colon LPMC.

CLPd2: cecal ligation and puncture sacrificed at day 2; CLPd7: cecal ligation and puncture sacrificed at day 7; DC: dendritic cell; LPMC: lamina propria mononuclear cells; MLN: mesenteric lymph nodes; Tregs: regulatory T cells
